# Supplementary material for: Finely-tuned regulation of AMP-activated protein kinase is crucial for human adult erythropoiesis
Source: PubMed Central journal article supplement — Haematologica. 2018 Oct 11;104(5):907–18. doi: 10.3324/haematol.2018.191403 (PMC6518903; doi:10.3324/haematol.2018.191403), 2019-05
Supplement: 2018.191403.LADLI_SUPPL.pdf [file 2018.191403.LADLI_SUPPL.pdf]

## Finely-tuned regulation of AMP-activated protein kinase is crucial for human adult erythropoiesis

Meriem Ladli,<sup>1,2,3,4</sup> Cyrielle Richard<sup>1,2,3,4</sup>, Lilia Cantero Aguilar,<sup>1,2,3,4</sup> Sarah Ducamp,<sup>1,2,3,4</sup> Sabrina Bondu,<sup>1,2,3,4</sup> Pierre Subjert,<sup>1,2,3</sup> Jérôme Tamburini,<sup>1,2,3</sup> Catherine Lacombe,<sup>1,2,3,4</sup> Nabih Azar,<sup>5</sup> Marc Foretz,<sup>1,2,3,4</sup> Yael Zermati,<sup>1,2,3,4</sup> Patrick Mayeux,<sup>1,2,3,4</sup> Benoit Viollet<sup>1,2,3,4</sup> and Frédérique Verdier<sup>1,2,3,4</sup>

<sup>1</sup>Institut Cochin, INSERM U1016; <sup>2</sup>CNRS UMR 8104, Paris; <sup>3</sup>Université Paris Descartes, Sorbonne Paris Cité; <sup>4</sup>Labex GREX and <sup>5</sup>Service d'Hémodiologie, Hôpital La Pitié Salpêtrière, Paris, France

©2019 Ferrata Storti Foundation. This is an open-access paper. doi:10.3324/haematol.2018.191403

Received: February 18, 2018.

Accepted: October 3, 2018.

Pre-published: October 11, 2018.

Correspondence: FRÉDÉRIQUE VERDIER frederique.verdier@inserm.fr

---

S1

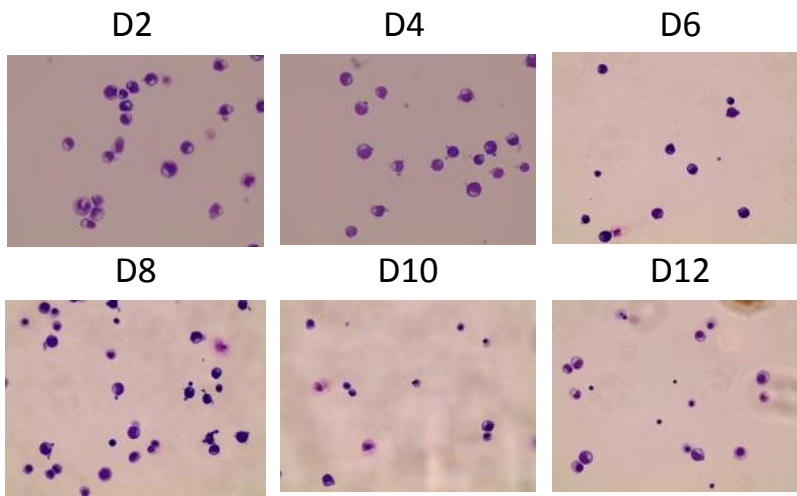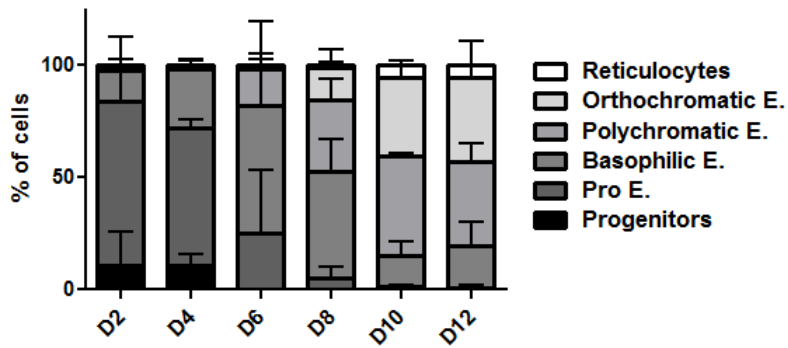

S2

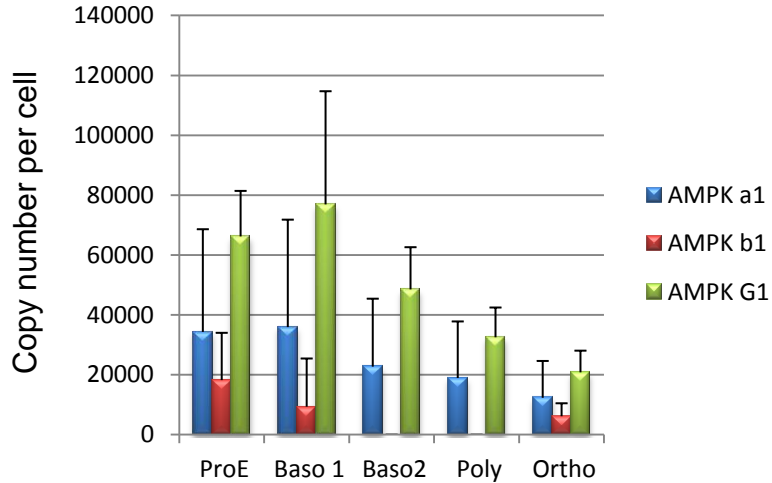

S3

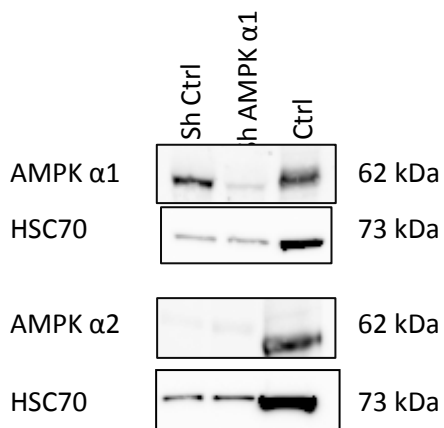

**S4**

D6

D8

D10

Sh Ctrl

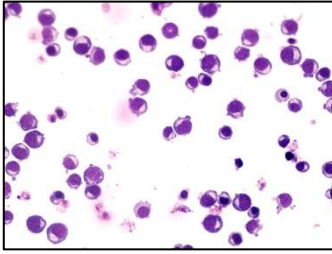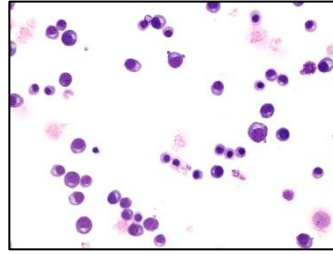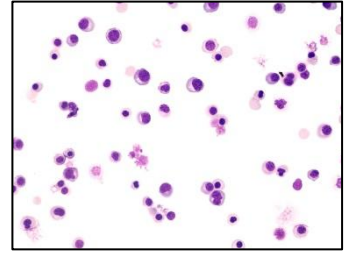Sh AMPK  $\alpha$ 1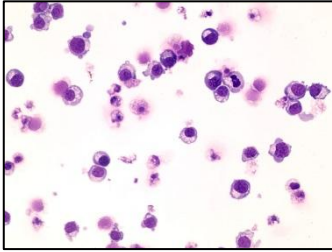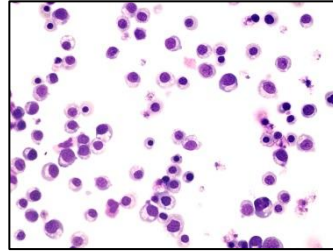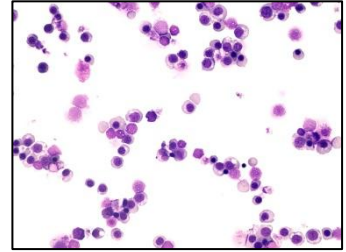**S5**

d2 d4 d6 d8

- + - + - + - +

pACC

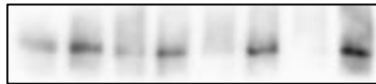

pULK

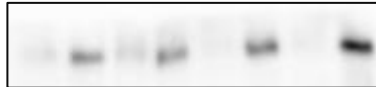

pAMPK

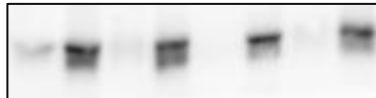

ACTINE

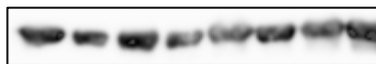**S6**

d9

- +

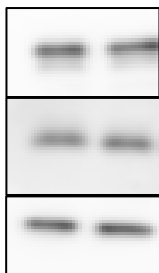

p53

p21

 $\beta$ -actin

S7A

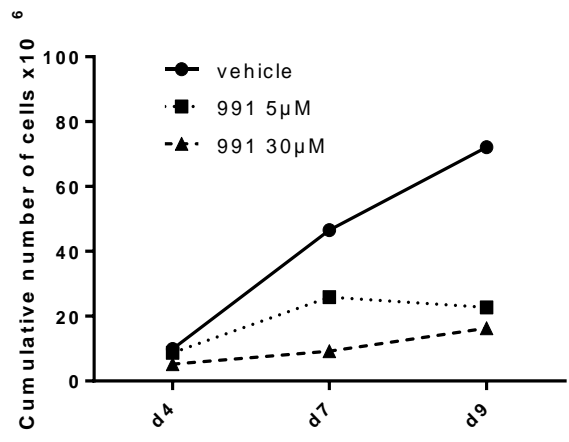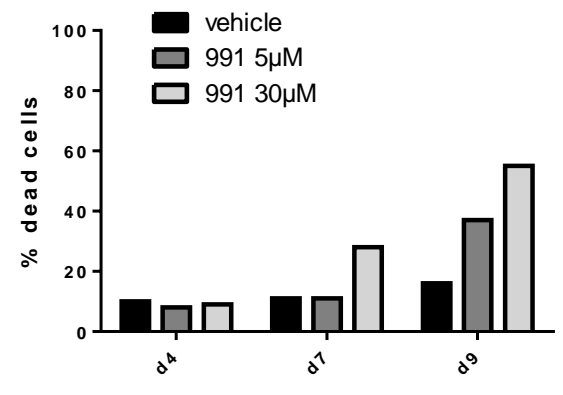

S7B

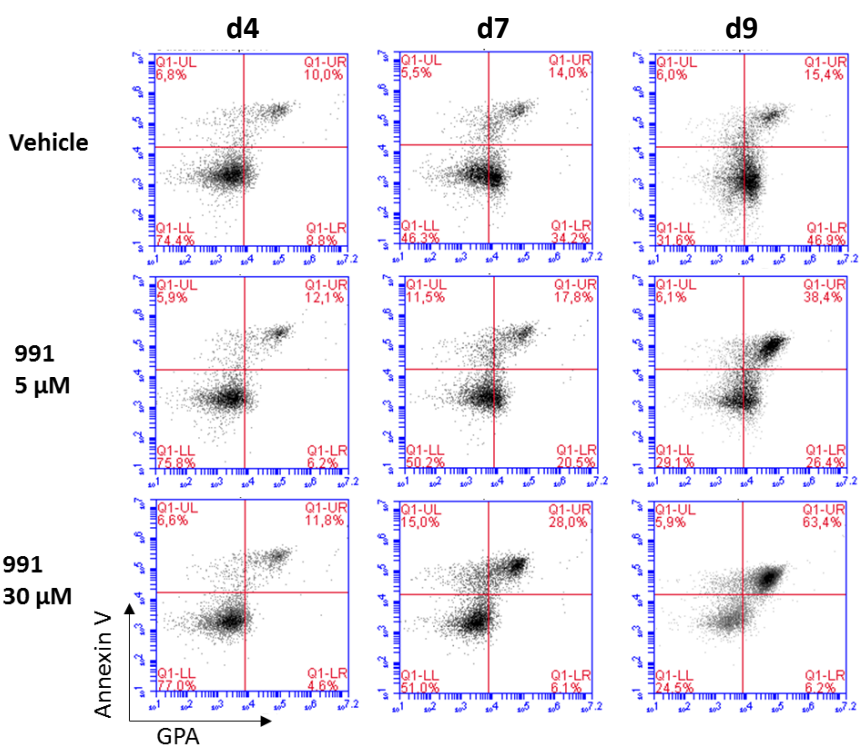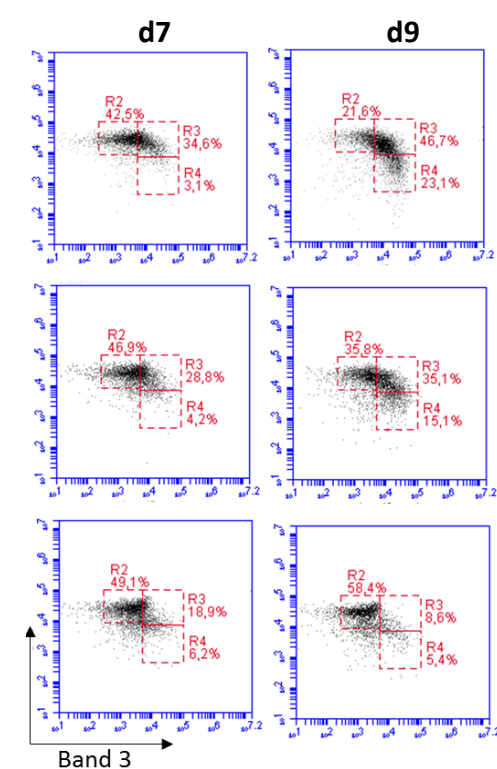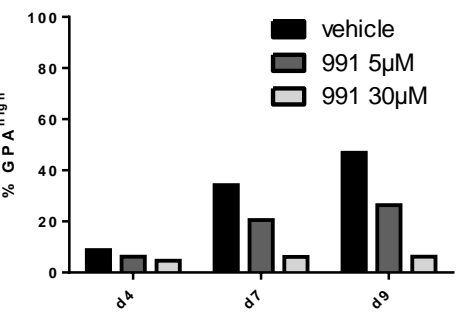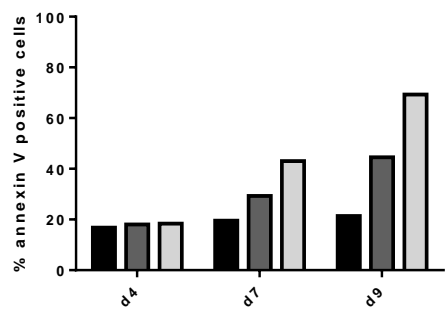

**Figure S1: Morphology analysis** was performed by May-Grumwald-Giemsa coloration; a representative experiment is shown at d2, d4, d6, d8, d10, d12. The mean cell composition from 3 independent experiments  $\pm$ SD was calculated according to the erythroblast morphology determined by MGG staining.

**Figure S2: Determination of AMPK Isoforms during erythropoiesis by quantitative proteomic.** Copy number of proteins in each differentiation stage was determined from data extracted from our work in <sup>11</sup>.

**Figure S3: Efficiency of the Sh AMPK $\alpha$ 1.** Protein extracts from Sh AMPK $\alpha$ 1 vs. Sh Ctrl cells at d8 of culture were analyzed by WB using anti-AMPK $\alpha$ 1,  $\alpha$ 2 antibodies. Anti-HSC70 was used as a loading control and HEK 293 protein extracts were used as a positive control for the expression of AMPK  $\alpha$ 2 (Ctrl).

**Figure S4: Morphology analysis of Sh AMPK $\alpha$ 1 vs. Sh Ctrl cells** was performed by May-Grumwald-Giemsa coloration; a representative experiment is shown at d6, d8 and d10.

**Figure S5: GSK621-induced activation of AMPK $\alpha$ 1 along erythroid maturation.** 20 $\mu$ M GSK621 was added at d1, Protein samples from primary erythroblasts at d2, d4, d6 and d8 were analysed by Western Blot using pT172 AMPK $\alpha$ 1, pS79 ACC and pS555 ULK1 antibodies. Anti- $\beta$  ACTIN antibodies were used as loading control.

**Figure S6: Expression of proteins regulating the cell cycle.** P53 and P21 were detected by WB experiments using specific antibodies.  $\beta$ -ACTIN was used as a loading control.

**Figure S7: 991-mediated AMPK activation leads to apoptosis of mature GPA<sup>High</sup> erythroblasts. (A)** Inhibition of cell proliferation and increased cell death in the presence of 991. Erythroid cells were incubated in the absence (vehicle) or presence of 5 or 30 $\mu$ M 991 from d0 to the indicated days of culture. Cumulative cell number (left panel) and proportion of dead cells (right panel) were determined by counting cells with Trypan blue exclusion method. **(B)** Expression of cell surface markers and Annexin V in the presence of 991. Cells were labeled with anti-GPA and for Annexin V binding and Band3/ $\alpha$ 4 integrin, then analyzed by flow cytometry. A representative

experiment and histogram with the percentage of GPA<sup>high</sup> and Annexin V positive cells are shown.
