# Supplementary material for: Finely-tuned regulation of AMP-activated protein kinase is crucial for human adult erythropoiesis
Source: PubMed Central journal article supplement — Haematologica. 2018 Oct 11;104(5):907–18. doi: 10.3324/haematol.2018.191403 (PMC6518903; doi:10.3324/haematol.2018.191403), 2019-05
Supplement: 2018_191403-Disclosures_and_Contributions.pdf [file 2018_191403-Disclosures_and_Contributions.pdf]

Haematologica  
HAEMATOL/2018/191403  
Version 4

Finely-tuned regulation of AMP-activated protein kinase (AMPK) is  
crucial for human adult erythropoiesis

Meriem Ladli, Cyrielle Richard, Lilia Cantero Aguilar, Sarah Ducamp,  
Sabrina Bondu, Pierre Sujobert, Jérôme Tamburini, Catherine  
Lacombe, Nabih Azar, Marc Foretz, Yael Zermati, Patrick Mayeux,  
Benoit Viollet, and Frédérique Verdier

Disclosures: This work was supported by the Laboratory of Excellence Labex GRex,  
funded by the french government.

Contributions: Authorship: ML, CR, LCA, and SB performed research, and analyzed and  
interpreted data; SD analyzed and interpreted data and participated in the discussion; NA  
provided essential materials; CL, PS JT and MF; provided essential materials and  
participated in the discussion; YZ analyzed and interpreted data and participated in the  
discussion PM interpreted data and participated in the discussion; BV provided essential  
materials, designed research and analyzed data; and FV designed research, analyzed and  
interpreted data and wrote the manuscript.
